# Supplementary material for: Microbial Flow Within an Air-Phyllosphere-Soil Continuum
Source: Front Microbiol. 2021 Jan 12;11:615481. doi: 10.3389/fmicb.2020.615481 (PMC7873851; doi:10.3389/fmicb.2020.615481)
Supplement: Supplementary Figure 1 — The specific design parameters of the equipment. [file Data_Sheet_1.docx]

Microbial flow within an air-phyllosphere-soil continuum

Shu-Yi-Dan Zhou 1, 2, a, Hu Li 1, 2, 3, a, *, Madeline Giles 4, Roy Neilson 4, Xiao-ru Yang 1, 2, 3, Jian-qiang Su 1, 2, 3

*1 Key Laboratory of Urban Environment and Health, Institute of Urban Environment, Chinese Academy of Sciences, 1799 Jimei Road, Xiamen 361021, China.*

*2 University of Chinese Academy of Sciences, 19A Yuquan Road, Beijing 100049, China.*

*3 Center for Excellence in Regional Atmospheric Environment, Institute of Urban Environment, Chinese Academy of Sciences, Xiamen 361021, China*

*4 Ecological Sciences, The James Hutton Institute, Dundee, DD2 5DA, Scotland, UK*

**Corresponding Author**

* Corresponding author: Hu Li

Key Laboratory of Urban Environment and Health, Institute of Urban Environment, Chinese Academy of Sciences, 1799 Jimei Road, Xiamen 361021, China

E-mail address: [hli@iue.ac.cn](mailto:hli@iue.ac.cn) (H. Li)

**
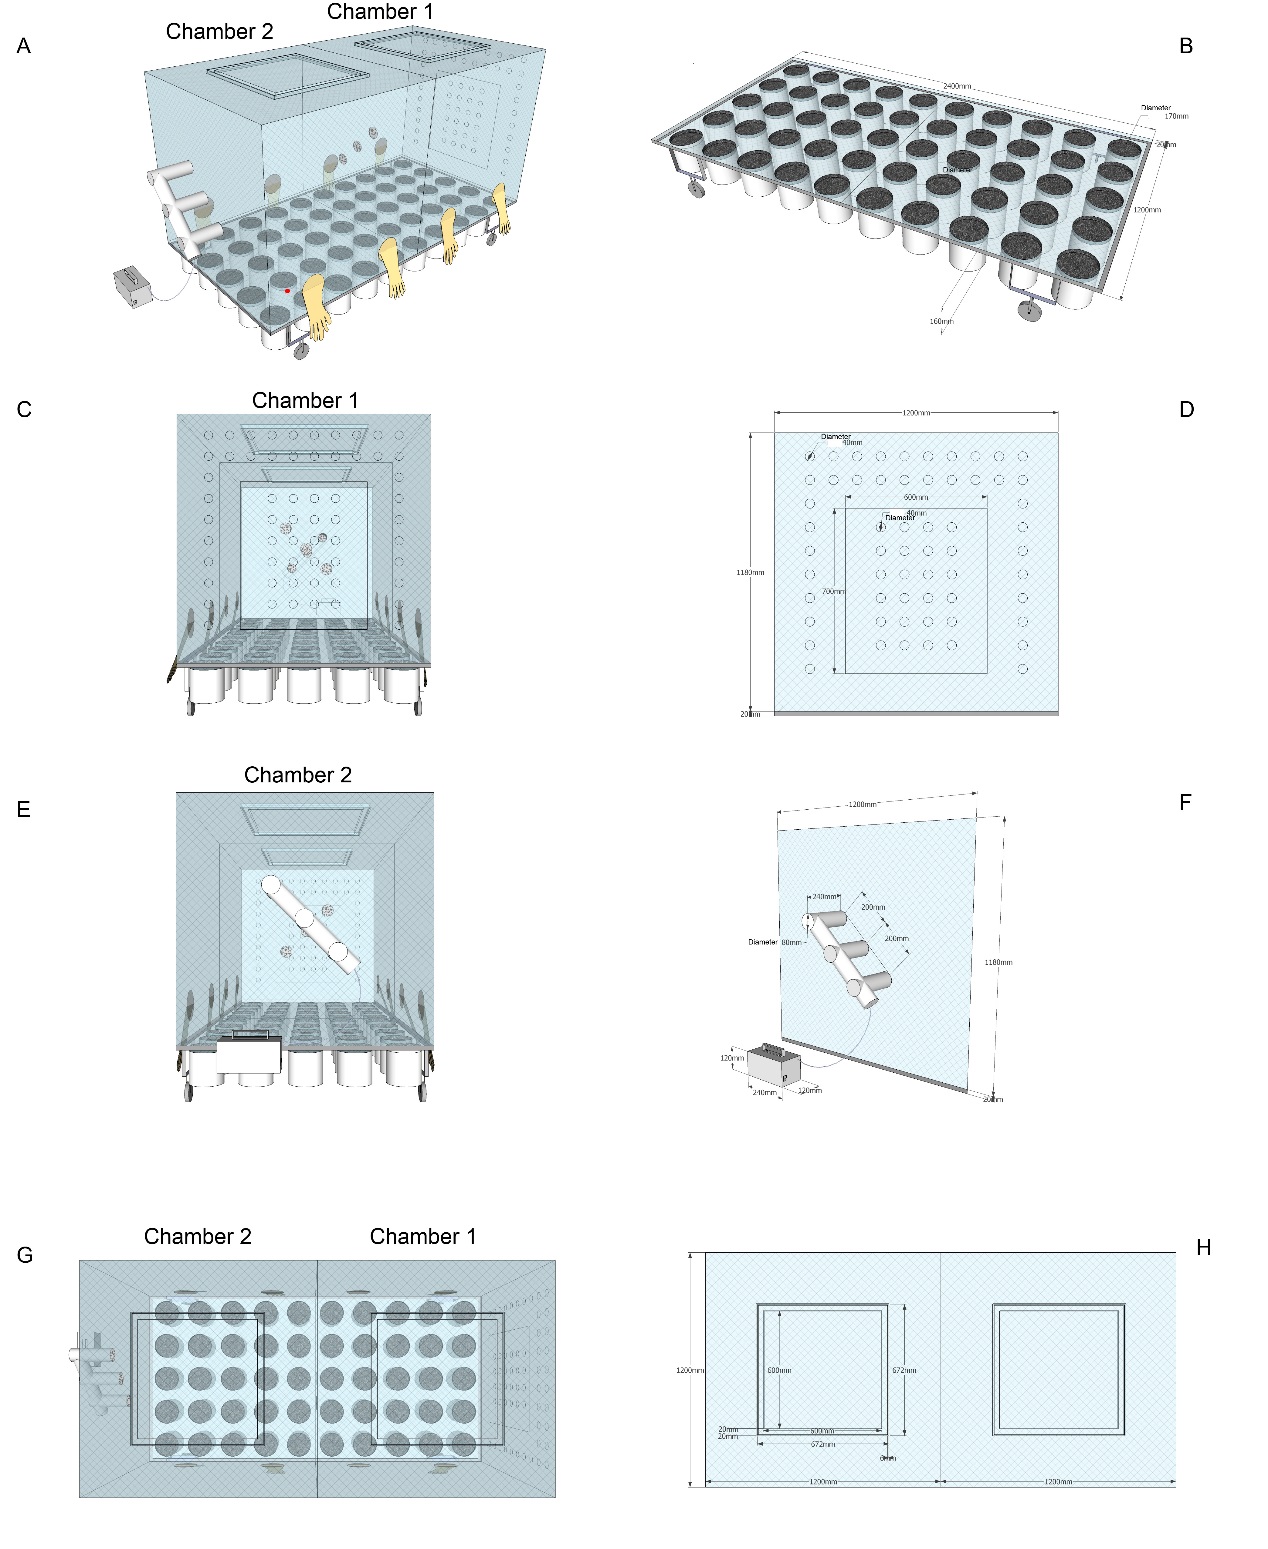
**

**Figure S1.** Design parameters of the constructed chambers used in this study. (A) and (B) front view of the equipment. (C), (D), (E) and (F) represent the right and left elevations of the equipment. (G) and (H) top view of the equipment.

Table S1. The analysis of variance among soil, phyllosphere and air samples (phylum level).

|  | | | Mean Difference (I-J) | Std.Error | Sig. | 95% Confidence Interval | |
| --- | --- | --- | --- | --- | --- | --- | --- |
| Lower Bound | Upper Bound |
|
| Proteobacteria | Soil | Phyllosphere | -.52515* | .02212 | .000 | -.5701 | -.4802 |
|  | Air | -.03978 | .02995 | .193 | -.1006 | .0210 |
|  | Phyllosphere | Soil | .52515* | .02212 | .000 | .4802 | .5701 |
|  | Air | .48538* | .02995 | .000 | .4246 | .5462 |
| Firmicutes | Soil | Phyllosphere | -.00873 | .02324 | .709 | -.0559 | .0385 |
|  | Air | .02171 | .03147 | .495 | -.0422 | .0856 |
|  | Phyllosphere | Soil | .00873 | .02324 | .709 | -.0385 | .0559 |
|  | Air | .03044 | .03147 | .340 | -.0335 | .0943 |
| Acidobacteria | Soil | Phyllosphere | .12971* | .00346 | .000 | .1227 | .1367 |
|  | Air | .03777* | .00468 | .000 | .0283 | .0473 |
|  | Phyllosphere | Soil | -.12971* | .00346 | .000 | -.1367 | -.1227 |
|  | Air | -.09193* | .00468 | .000 | -.1014 | -.0824 |
| Crenarchaeota | Soil | Phyllosphere | .12227* | .01130 | .000 | .0993 | .1452 |
|  | Air | .04090* | .01530 | .011 | .0098 | .0720 |
|  | Phyllosphere | Soil | -.12227* | .01130 | .000 | -.1452 | -.0993 |
|  | Air | -.08137* | .01530 | .000 | -.1124 | -.0503 |
| Actinobacteria | Soil | Phyllosphere | .02941* | .00871 | .002 | .0117 | .0471 |
|  | Air | .01170 | .01179 | .328 | -.0122 | .0356 |
|  | Phyllosphere | Soil | -.02941* | .00871 | .002 | -.0471 | -.0117 |
|  | Air | -.01771 | .01179 | .142 | -.0416 | .0062 |
| Chloroflexi | Soil | Phyllosphere | .08282* | .00217 | .000 | .0784 | .0872 |
|  | Air | -.02065* | .00294 | .000 | -.0266 | -.0147 |
|  | Phyllosphere | Soil | -.08282* | .00217 | .000 | -.0872 | -.0784 |
|  | Air | -.10347* | .00294 | .000 | -.1094 | -.0975 |
| Bacteroidetes | Soil | Phyllosphere | .01593 | .00874 | .077 | -.0018 | .0337 |
|  | Air | .03132* | .01183 | .012 | .0073 | .0553 |
|  | Phyllosphere | Soil | -.01593 | .00874 | .077 | -.0337 | .0018 |
|  | Air | .01539 | .01183 | .202 | -.0086 | .0394 |
| Planctomycetes | Soil | Phyllosphere | .06382* | .00212 | .000 | .0595 | .0681 |
|  | Air | .00759* | .00288 | .012 | .0017 | .0134 |
|  | Phyllosphere | Soil | -.06382* | .00212 | .000 | -.0681 | -.0595 |
|  | Air | -.05623* | .00288 | .000 | -.0621 | -.0504 |
| Nitrospirae | Soil | Phyllosphere | .01882* | .00122 | .000 | .0163 | .0213 |
|  | Air | -.05669* | .00165 | .000 | -.0600 | -.0533 |
|  | Phyllosphere | Soil | -.01882* | .00122 | .000 | -.0213 | -.0163 |
|  | Air | -.07551* | .00165 | .000 | -.0789 | -.0722 |
| Cyanobacteria | Soil | Phyllosphere | .01666* | .00783 | .041 | .0008 | .0326 |
|  | Air | .01399 | .01061 | .196 | -.0075 | .0355 |
|  | Phyllosphere | Soil | -.01666* | .00783 | .041 | -.0326 | -.0008 |
|  | Air | -.00267 | .01061 | .803 | -.0242 | .0189 |
| Other | Soil | Phyllosphere | .01744* | .00259 | .000 | .0122 | .0227 |
|  | Air | -.00882* | .00351 | .017 | -.0159 | -.0017 |
|  | Phyllosphere | Soil | -.01744* | .00259 | .000 | -.0227 | -.0122 |
|  | Air | -.02625* | .00351 | .000 | -.0334 | -.0191 |
| *. The mean difference is significant at the 0.05 level. | | | | | | | |

Table S2. The analysis of variance between plant species in different chamber (phylum level).

|  | | | Mean Difference (I-J) | Std.Error | Sig. | 95% Confidence Interval | |
| --- | --- | --- | --- | --- | --- | --- | --- |
| Lower Bound | Upper Bound |
|
| Proteobacteria | PSONM | PSOM | .00777 | .05973 | .899 | -.1224 | .1379 |
| PCNM | .10045 | .05973 | .118 | -.0297 | .2306 |
| PCM | .11999 | .05973 | .068 | -.0101 | .2501 |
| PSOM | PSONM | -.00777 | .05973 | .899 | -.1379 | .1224 |
| PCNM | .09268 | .05973 | .147 | -.0375 | .2228 |
| PCM | .11222 | .05973 | .085 | -.0179 | .2424 |
| PCNM | PSONM | -.10045 | .05973 | .118 | -.2306 | .0297 |
| PSOM | -.09268 | .05973 | .147 | -.2228 | .0375 |
| PCM | .01954 | .05973 | .749 | -.1106 | .1497 |
| PCM | PSONM | -.11999 | .05973 | .068 | -.2501 | .0101 |
| PSOM | -.11222 | .05973 | .085 | -.2424 | .0179 |
| PCNM | -.01954 | .05973 | .749 | -.1497 | .1106 |
| Firmicutes | PSONM | PSOM | .00092 | .06512 | .989 | -.1410 | .1428 |
| PCNM | -.08116 | .06512 | .236 | -.2230 | .0607 |
| PCM | -.12432 | .06512 | .080 | -.2662 | .0176 |
| PSOM | PSONM | -.00092 | .06512 | .989 | -.1428 | .1410 |
| PCNM | -.08207 | .06512 | .232 | -.2240 | .0598 |
| PCM | -.12524 | .06512 | .079 | -.2671 | .0166 |
| PCNM | PSONM | .08116 | .06512 | .236 | -.0607 | .2230 |
| PSOM | .08207 | .06512 | .232 | -.0598 | .2240 |
| PCM | -.04317 | .06512 | .520 | -.1851 | .0987 |
| PCM | PSONM | .12432 | .06512 | .080 | -.0176 | .2662 |
| PSOM | .12524 | .06512 | .079 | -.0166 | .2671 |
| PCNM | .04317 | .06512 | .520 | -.0987 | .1851 |
| Acidobacteria | PSONM | PSOM | -.00059 | .00130 | .658 | -.0034 | .0022 |
| PCNM | -.00235 | .00130 | .096 | -.0052 | .0005 |
| PCM | -.00447* | .00130 | .005 | -.0073 | -.0016 |
| PSOM | PSONM | .00059 | .00130 | .658 | -.0022 | .0034 |
| PCNM | -.00176 | .00130 | .201 | -.0046 | .0011 |
| PCM | -.00388* | .00130 | .011 | -.0067 | -.0011 |
| PCNM | PSONM | .00235 | .00130 | .096 | -.0005 | .0052 |
| PSOM | .00176 | .00130 | .201 | -.0011 | .0046 |
| PCM | -.00212 | .00130 | .128 | -.0050 | .0007 |
| PCM | PSONM | .00447* | .00130 | .005 | .0016 | .0073 |
| PSOM | .00388* | .00130 | .011 | .0011 | .0067 |
| PCNM | .00212 | .00130 | .128 | -.0007 | .0050 |
| Crenarchaeota | PSONM | PSOM | -.00024 | .00131 | .855 | -.0031 | .0026 |
| PCNM | -.00201 | .00131 | .151 | -.0049 | .0008 |
| PCM | -.00446* | .00131 | .005 | -.0073 | -.0016 |
| PSOM | PSONM | .00024 | .00131 | .855 | -.0026 | .0031 |
| PCNM | -.00177 | .00131 | .202 | -.0046 | .0011 |
| PCM | -.00422* | .00131 | .007 | -.0071 | -.0014 |
| PCNM | PSONM | .00201 | .00131 | .151 | -.0008 | .0049 |
| PSOM | .00177 | .00131 | .202 | -.0011 | .0046 |
| PCM | -.00245 | .00131 | .085 | -.0053 | .0004 |
| PCM | PSONM | .00446* | .00131 | .005 | .0016 | .0073 |
| PSOM | .00422* | .00131 | .007 | .0014 | .0071 |
| PCNM | .00245 | .00131 | .085 | -.0004 | .0053 |
| Actinobacteria | PSONM | PSOM | .05128* | .02135 | .033 | .0048 | .0978 |
| PCNM | -.00078 | .02135 | .971 | -.0473 | .0457 |
| PCM | .04481 | .02135 | .058 | -.0017 | .0913 |
| PSOM | PSONM | -.05128* | .02135 | .033 | -.0978 | -.0048 |
| PCNM | -.05206* | .02135 | .031 | -.0986 | -.0055 |
| PCM | -.00647 | .02135 | .767 | -.0530 | .0401 |
| PCNM | PSONM | .00078 | .02135 | .971 | -.0457 | .0473 |
| PSOM | .05206* | .02135 | .031 | .0055 | .0986 |
| PCM | .04560 | .02135 | .054 | -.0009 | .0921 |
| PCM | PSONM | -.04481 | .02135 | .058 | -.0913 | .0017 |
| PSOM | .00647 | .02135 | .767 | -.0401 | .0530 |
| PCNM | -.04560 | .02135 | .054 | -.0921 | .0009 |
| Chloroflexi | PSONM | PSOM | -.00051 | .00195 | .796 | -.0048 | .0037 |
| PCNM | -.00412 | .00195 | .056 | -.0084 | .0001 |
| PCM | -.00608* | .00195 | .009 | -.0103 | -.0018 |
| PSOM | PSONM | .00051 | .00195 | .796 | -.0037 | .0048 |
| PCNM | -.00361 | .00195 | .089 | -.0079 | .0006 |
| PCM | -.00556* | .00195 | .015 | -.0098 | -.0013 |
| PCNM | PSONM | .00412 | .00195 | .056 | -.0001 | .0084 |
| PSOM | .00361 | .00195 | .089 | -.0006 | .0079 |
| PCM | -.00195 | .00195 | .336 | -.0062 | .0023 |
| PCM | PSONM | .00608* | .00195 | .009 | .0018 | .0103 |
| PSOM | .00556* | .00195 | .015 | .0013 | .0098 |
| PCNM | .00195 | .00195 | .336 | -.0023 | .0062 |
| Bacteroidetes | PSONM | PSOM | -.04682 | .02477 | .083 | -.1008 | .0072 |
| PCNM | -.00460 | .02477 | .856 | -.0586 | .0494 |
| PCM | -.00117 | .02477 | .963 | -.0551 | .0528 |
| PSOM | PSONM | .04682 | .02477 | .083 | -.0072 | .1008 |
| PCNM | .04222 | .02477 | .114 | -.0118 | .0962 |
| PCM | .04564 | .02477 | .090 | -.0083 | .0996 |
| PCNM | PSONM | .00460 | .02477 | .856 | -.0494 | .0586 |
| PSOM | -.04222 | .02477 | .114 | -.0962 | .0118 |
| PCM | .00342 | .02477 | .892 | -.0506 | .0574 |
| PCM | PSONM | .00117 | .02477 | .963 | -.0528 | .0551 |
| PSOM | -.04564 | .02477 | .090 | -.0996 | .0083 |
| PCNM | -.00342 | .02477 | .892 | -.0574 | .0506 |
| Planctomycetes | PSONM | PSOM | -.00023 | .00091 | .808 | -.0022 | .0018 |
| PCNM | -.00360* | .00091 | .002 | -.0056 | -.0016 |
| PCM | -.00420* | .00091 | .001 | -.0062 | -.0022 |
| PSOM | PSONM | .00023 | .00091 | .808 | -.0018 | .0022 |
| PCNM | -.00337* | .00091 | .003 | -.0054 | -.0014 |
| PCM | -.00398* | .00091 | .001 | -.0060 | -.0020 |
| PCNM | PSONM | .00360* | .00091 | .002 | .0016 | .0056 |
| PSOM | .00337* | .00091 | .003 | .0014 | .0054 |
| PCM | -.00060 | .00091 | .520 | -.0026 | .0014 |
| PCM | PSONM | .00420* | .00091 | .001 | .0022 | .0062 |
| PSOM | .00398* | .00091 | .001 | .0020 | .0060 |
| PCNM | .00060 | .00091 | .520 | -.0014 | .0026 |
| Nitrospirae | PSONM | PSOM | -.00043 | .00127 | .739 | -.0032 | .0023 |
| PCNM | -.00183 | .00127 | .176 | -.0046 | .0009 |
| PCM | -.00415* | .00127 | .007 | -.0069 | -.0014 |
| PSOM | PSONM | .00043 | .00127 | .739 | -.0023 | .0032 |
| PCNM | -.00139 | .00127 | .295 | -.0042 | .0014 |
| PCM | -.00372* | .00127 | .013 | -.0065 | -.0009 |
| PCNM | PSONM | .00183 | .00127 | .176 | -.0009 | .0046 |
| PSOM | .00139 | .00127 | .295 | -.0014 | .0042 |
| PCM | -.00232 | .00127 | .092 | -.0051 | .0004 |
| PCM | PSONM | .00415* | .00127 | .007 | .0014 | .0069 |
| PSOM | .00372* | .00127 | .013 | .0009 | .0065 |
| PCNM | .00232 | .00127 | .092 | -.0004 | .0051 |
| Cyanobacteria | PSONM | PSOM | -.00046 | .00529 | .932 | -.0120 | .0111 |
| PCNM | -.00698 | .00529 | .212 | -.0185 | .0046 |
| PCM | -.01268* | .00529 | .034 | -.0242 | -.0011 |
| PSOM | PSONM | .00046 | .00529 | .932 | -.0111 | .0120 |
| PCNM | -.00652 | .00529 | .242 | -.0181 | .0050 |
| PCM | -.01222* | .00529 | .040 | -.0237 | -.0007 |
| PCNM | PSONM | .00698 | .00529 | .212 | -.0046 | .0185 |
| PSOM | .00652 | .00529 | .242 | -.0050 | .0181 |
| PCM | -.00570 | .00529 | .303 | -.0172 | .0058 |
| PCM | PSONM | .01268* | .00529 | .034 | .0011 | .0242 |
| PSOM | .01222* | .00529 | .040 | .0007 | .0237 |
| PCNM | .00570 | .00529 | .303 | -.0058 | .0172 |
| Other | PSONM | PSOM | -.00994 | .00496 | .068 | -.0207 | .0009 |
| PCNM | .01056 | .00496 | .055 | -.0002 | .0214 |
| PCM | .00122 | .00496 | .810 | -.0096 | .0120 |
| PSOM | PSONM | .00994 | .00496 | .068 | -.0009 | .0207 |
| PCNM | .02050* | .00496 | .001 | .0097 | .0313 |
| PCM | .01116* | .00496 | .044 | .0003 | .0220 |
| PCNM | PSONM | -.01056 | .00496 | .055 | -.0214 | .0002 |
| PSOM | -.02050* | .00496 | .001 | -.0313 | -.0097 |
| PCM | -.00934 | .00496 | .084 | -.0202 | .0015 |
| PCM | PSONM | -.00122 | .00496 | .810 | -.0120 | .0096 |
| PSOM | -.01116* | .00496 | .044 | -.0220 | -.0003 |
| PCNM | .00934 | .00496 | .084 | -.0015 | .0202 |
| *. The mean difference is significant at the 0.05 level. | | | | | | | |

Table S3. The analysis of variance among soil, phyllosphere and air samples (family level).

|  | | | Mean Difference (I-J) | Std.Error | Sig. | 95% Confidence Interval | |
| --- | --- | --- | --- | --- | --- | --- | --- |
| Lower Bound | Upper Bound |
|
| Bacillaceae | Soil | Phyllosphere | -.03412 | .02297 | .146 | -.0807 | .0125 |
|  | Air | .02936 | .03110 | .352 | -.0338 | .0925 |
|  | Phyllosphere | Soil | .03412 | .02297 | .146 | -.0125 | .0807 |
|  | Air | .06348* | .03110 | .049 | .0003 | .1266 |
| Nitrososphaeraceae | Soil | Phyllosphere | .12142* | .01119 | .000 | .0987 | .1441 |
|  | Air | .05027* | .01515 | .002 | .0195 | .0810 |
|  | Phyllosphere | Soil | -.12142* | .01119 | .000 | -.1441 | -.0987 |
|  | Air | -.07115* | .01515 | .000 | -.1019 | -.0404 |
| Rhizobiaceae | Soil | Phyllosphere | -.37361* | .04071 | .000 | -.4563 | -.2910 |
|  | Air | -.00019 | .05512 | .997 | -.1121 | .1117 |
|  | Phyllosphere | Soil | .37361* | .04071 | .000 | .2910 | .4563 |
|  | Air | .37342* | .05512 | .000 | .2615 | .4853 |
| Pseudomonadaceae | Soil | Phyllosphere | -.13899* | .03141 | .000 | -.2027 | -.0752 |
|  | Air | -.00686 | .04252 | .873 | -.0932 | .0795 |
|  | Phyllosphere | Soil | .13899* | .03141 | .000 | .0752 | .2027 |
|  | Air | .13212* | .04252 | .004 | .0458 | .2185 |
| Hyphomicrobiaceae | Soil | Phyllosphere | .02248* | .00320 | .000 | .0160 | .0290 |
|  | Air | .01427* | .00433 | .002 | .0055 | .0231 |
|  | Phyllosphere | Soil | -.02248* | .00320 | .000 | -.0290 | -.0160 |
|  | Air | -.00821 | .00433 | .066 | -.0170 | .0006 |
| Pirellulaceae | Soil | Phyllosphere | .02993* | .00110 | .000 | .0277 | .0322 |
|  | Air | .00530* | .00149 | .001 | .0023 | .0083 |
|  | Phyllosphere | Soil | -.02993* | .00110 | .000 | -.0322 | -.0277 |
|  | Air | -.02462* | .00149 | .000 | -.0276 | -.0216 |
| Syntrophobacteraceae | Soil | Phyllosphere | .02609* | .00085 | .000 | .0244 | .0278 |
|  | Air | -.00396* | .00115 | .002 | -.0063 | -.0016 |
|  | Phyllosphere | Soil | -.02609* | .00085 | .000 | -.0278 | -.0244 |
|  | Air | -.03005* | .00115 | .000 | -.0324 | -.0277 |
| Chitinophagaceae | Soil | Phyllosphere | .01961* | .00158 | .000 | .0164 | .0228 |
|  | Air | .01904* | .00213 | .000 | .0147 | .0234 |
|  | Phyllosphere | Soil | -.01961* | .00158 | .000 | -.0228 | -.0164 |
|  | Air | -.00057 | .00213 | .792 | -.0049 | .0038 |
| Cytophagaceae | Soil | Phyllosphere | .01950* | .00176 | .000 | .0159 | .0231 |
|  | Air | .01948* | .00239 | .000 | .0146 | .0243 |
|  | Phyllosphere | Soil | -.01950* | .00176 | .000 | -.0231 | -.0159 |
|  | Air | -.00002 | .00239 | .994 | -.0049 | .0048 |
| Xanthomonadaceae | Soil | Phyllosphere | -.02744* | .01063 | .014 | -.0490 | -.0059 |
|  | Air | -.00154 | .01439 | .916 | -.0308 | .0277 |
|  | Phyllosphere | Soil | .02744* | .01063 | .014 | .0059 | .0490 |
|  | Air | .02590 | .01439 | .081 | -.0033 | .0551 |
| Other | Soil | Phyllosphere | .01745* | .00260 | .000 | .0122 | .0227 |
|  | Air | -.00882* | .00351 | .017 | -.0159 | -.0017 |
|  | Phyllosphere | Soil | -.01745* | .00260 | .000 | -.0227 | -.0122 |
|  | Air | -.02626* | .00351 | .000 | -.0334 | -.0191 |
| *. The mean difference is significant at the 0.05 level. | | | | | | | |

Table S4. The analysis of variance between plant species in different chamber (family level).

|  | | | Mean Difference (I-J) | Std.Error | Sig. | 95% Confidence Interval | |
| --- | --- | --- | --- | --- | --- | --- | --- |
| Lower Bound | Upper Bound |
|
| Rhizobiaceae | PSONM | PSOM | .03003 | .11882 | .805 | -.2289 | .2889 |
| PCNM | .10790 | .11882 | .382 | -.1510 | .3668 |
| PCM | .22889 | .11882 | .078 | -.0300 | .4878 |
| PSOM | PSONM | -.03003 | .11882 | .805 | -.2889 | .2289 |
| PCNM | .07787 | .11882 | .525 | -.1810 | .3368 |
| PCM | .19886 | .11882 | .120 | -.0600 | .4578 |
| PCNM | PSONM | -.10790 | .11882 | .382 | -.3668 | .1510 |
| PSOM | -.07787 | .11882 | .525 | -.3368 | .1810 |
| PCM | .12099 | .11882 | .329 | -.1379 | .3799 |
| PCM | PSONM | -.22889 | .11882 | .078 | -.4878 | .0300 |
| PSOM | -.19886 | .11882 | .120 | -.4578 | .0600 |
| PCNM | -.12099 | .11882 | .329 | -.3799 | .1379 |
| Nitrososphaeraceae | PSONM | PSOM | -.00019 | .00106 | .859 | -.0025 | .0021 |
| PCNM | -.00205 | .00106 | .077 | -.0044 | .0003 |
| PCM | -.00366* | .00106 | .005 | -.0060 | -.0014 |
| PSOM | PSONM | .00019 | .00106 | .859 | -.0021 | .0025 |
| PCNM | -.00186 | .00106 | .105 | -.0042 | .0004 |
| PCM | -.00347* | .00106 | .007 | -.0058 | -.0012 |
| PCNM | PSONM | .00205 | .00106 | .077 | -.0003 | .0044 |
| PSOM | .00186 | .00106 | .105 | -.0004 | .0042 |
| PCM | -.00161 | .00106 | .155 | -.0039 | .0007 |
| PCM | PSONM | .00366* | .00106 | .005 | .0014 | .0060 |
| PSOM | .00347* | .00106 | .007 | .0012 | .0058 |
| PCNM | .00161 | .00106 | .155 | -.0007 | .0039 |
| Bacillaceae | PSONM | PSOM | .06730 | .05606 | .253 | -.0548 | .1894 |
| PCNM | -.06644 | .05606 | .259 | -.1886 | .0557 |
| PCM | -.10858 | .05606 | .077 | -.2307 | .0136 |
| PSOM | PSONM | -.06730 | .05606 | .253 | -.1894 | .0548 |
| PCNM | -.13374* | .05606 | .034 | -.2559 | -.0116 |
| PCM | -.17588* | .05606 | .009 | -.2980 | -.0537 |
| PCNM | PSONM | .06644 | .05606 | .259 | -.0557 | .1886 |
| PSOM | .13374* | .05606 | .034 | .0116 | .2559 |
| PCM | -.04214 | .05606 | .467 | -.1643 | .0800 |
| PCM | PSONM | .10858 | .05606 | .077 | -.0136 | .2307 |
| PSOM | .17588* | .05606 | .009 | .0537 | .2980 |
| PCNM | .04214 | .05606 | .467 | -.0800 | .1643 |
| Pseudomonadaceae | PSONM | PSOM | -.06763 | .08393 | .436 | -.2505 | .1152 |
| PCNM | .15626 | .08393 | .087 | -.0266 | .3391 |
| PCM | .00656 | .08393 | .939 | -.1763 | .1894 |
| PSOM | PSONM | .06763 | .08393 | .436 | -.1152 | .2505 |
| PCNM | .22390* | .08393 | .020 | .0410 | .4068 |
| PCM | .07420 | .08393 | .394 | -.1087 | .2571 |
| PCNM | PSONM | -.15626 | .08393 | .087 | -.3391 | .0266 |
| PSOM | -.22390* | .08393 | .020 | -.4068 | -.0410 |
| PCM | -.14970 | .08393 | .100 | -.3326 | .0332 |
| PCM | PSONM | -.00656 | .08393 | .939 | -.1894 | .1763 |
| PSOM | -.07420 | .08393 | .394 | -.2571 | .1087 |
| PCNM | .14970 | .08393 | .100 | -.0332 | .3326 |
| Hyphomicrobiaceae | PSONM | PSOM | .00282 | .00580 | .635 | -.0098 | .0155 |
| PCNM | -.02384* | .00580 | .001 | -.0365 | -.0112 |
| PCM | -.00615 | .00580 | .310 | -.0188 | .0065 |
| PSOM | PSONM | -.00282 | .00580 | .635 | -.0155 | .0098 |
| PCNM | -.02666* | .00580 | .001 | -.0393 | -.0140 |
| PCM | -.00897 | .00580 | .148 | -.0216 | .0037 |
| PCNM | PSONM | .02384* | .00580 | .001 | .0112 | .0365 |
| PSOM | .02666* | .00580 | .001 | .0140 | .0393 |
| PCM | .01769* | .00580 | .010 | .0051 | .0303 |
| PCM | PSONM | .00615 | .00580 | .310 | -.0065 | .0188 |
| PSOM | .00897 | .00580 | .148 | -.0037 | .0216 |
| PCNM | -.01769* | .00580 | .010 | -.0303 | -.0051 |
| Pirellulaceae | PSONM | PSOM | -.00014 | .00054 | .802 | -.0013 | .0010 |
| PCNM | -.00123* | .00054 | .041 | -.0024 | -.0001 |
| PCM | -.00218* | .00054 | .002 | -.0033 | -.0010 |
| PSOM | PSONM | .00014 | .00054 | .802 | -.0010 | .0013 |
| PCNM | -.00109 | .00054 | .065 | -.0023 | .0001 |
| PCM | -.00204* | .00054 | .003 | -.0032 | -.0009 |
| PCNM | PSONM | .00123* | .00054 | .041 | .0001 | .0024 |
| PSOM | .00109 | .00054 | .065 | -.0001 | .0023 |
| PCM | -.00095 | .00054 | .102 | -.0021 | .0002 |
| PCM | PSONM | .00218* | .00054 | .002 | .0010 | .0033 |
| PSOM | .00204* | .00054 | .003 | .0009 | .0032 |
| PCNM | .00095 | .00054 | .102 | -.0002 | .0021 |
| Syntrophobacteraceae | PSONM | PSOM | -.00014 | .00048 | .783 | -.0012 | .0009 |
| PCNM | -.00109* | .00048 | .043 | -.0021 | .0000 |
| PCM | -.00152* | .00048 | .008 | -.0026 | -.0005 |
| PSOM | PSONM | .00014 | .00048 | .783 | -.0009 | .0012 |
| PCNM | -.00095 | .00048 | .072 | -.0020 | .0001 |
| PCM | -.00139* | .00048 | .014 | -.0024 | -.0003 |
| PCNM | PSONM | .00109* | .00048 | .043 | .0000 | .0021 |
| PSOM | .00095 | .00048 | .072 | -.0001 | .0020 |
| PCM | -.00043 | .00048 | .387 | -.0015 | .0006 |
| PCM | PSONM | .00152* | .00048 | .008 | .0005 | .0026 |
| PSOM | .00139* | .00048 | .014 | .0003 | .0024 |
| PCNM | .00043 | .00048 | .387 | -.0006 | .0015 |
| Chitinophagaceae | PSONM | PSOM | -.00068 | .00056 | .246 | -.0019 | .0005 |
| PCNM | -.01399* | .00056 | .000 | -.0152 | -.0128 |
| PCM | -.00058 | .00056 | .321 | -.0018 | .0006 |
| PSOM | PSONM | .00068 | .00056 | .246 | -.0005 | .0019 |
| PCNM | -.01331* | .00056 | .000 | -.0145 | -.0121 |
| PCM | .00010 | .00056 | .856 | -.0011 | .0013 |
| PCNM | PSONM | .01399* | .00056 | .000 | .0128 | .0152 |
| PSOM | .01331* | .00056 | .000 | .0121 | .0145 |
| PCM | .01341* | .00056 | .000 | .0122 | .0146 |
| PCM | PSONM | .00058 | .00056 | .321 | -.0006 | .0018 |
| PSOM | -.00010 | .00056 | .856 | -.0013 | .0011 |
| PCNM | -.01341* | .00056 | .000 | -.0146 | -.0122 |
| Cytophagaceae | PSONM | PSOM | -.00067 | .00432 | .879 | -.0101 | .0088 |
| PCNM | -.00442 | .00432 | .327 | -.0138 | .0050 |
| PCM | -.00874 | .00432 | .066 | -.0182 | .0007 |
| PSOM | PSONM | .00067 | .00432 | .879 | -.0088 | .0101 |
| PCNM | -.00375 | .00432 | .403 | -.0132 | .0057 |
| PCM | -.00807 | .00432 | .087 | -.0175 | .0014 |
| PCNM | PSONM | .00442 | .00432 | .327 | -.0050 | .0138 |
| PSOM | .00375 | .00432 | .403 | -.0057 | .0132 |
| PCM | -.00432 | .00432 | .337 | -.0137 | .0051 |
| PCM | PSONM | .00874 | .00432 | .066 | -.0007 | .0182 |
| PSOM | .00807 | .00432 | .087 | -.0014 | .0175 |
| PCNM | .00432 | .00432 | .337 | -.0051 | .0137 |
| Xanthomonadaceae | PSONM | PSOM | .00506 | .03106 | .873 | -.0626 | .0727 |
| PCNM | .02531 | .03106 | .431 | -.0424 | .0930 |
| PCM | -.03829 | .03106 | .241 | -.1060 | .0294 |
| PSOM | PSONM | -.00506 | .03106 | .873 | -.0727 | .0626 |
| PCNM | .02025 | .03106 | .527 | -.0474 | .0879 |
| PCM | -.04336 | .03106 | .188 | -.1110 | .0243 |
| PCNM | PSONM | -.02531 | .03106 | .431 | -.0930 | .0424 |
| PSOM | -.02025 | .03106 | .527 | -.0879 | .0474 |
| PCM | -.06361 | .03106 | .063 | -.1313 | .0041 |
| PCM | PSONM | .03829 | .03106 | .241 | -.0294 | .1060 |
| PSOM | .04336 | .03106 | .188 | -.0243 | .1110 |
| PCNM | .06361 | .03106 | .063 | -.0041 | .1313 |
| Other | PSONM | PSOM | -.00994 | .00496 | .068 | -.0207 | .0009 |
| PCNM | .01060 | .00496 | .054 | -.0002 | .0214 |
| PCM | .00122 | .00496 | .810 | -.0096 | .0120 |
| PSOM | PSONM | .00994 | .00496 | .068 | -.0009 | .0207 |
| PCNM | .02054* | .00496 | .001 | .0097 | .0314 |
| PCM | .01116* | .00496 | .044 | .0003 | .0220 |
| PCNM | PSONM | -.01060 | .00496 | .054 | -.0214 | .0002 |
| PSOM | -.02054* | .00496 | .001 | -.0314 | -.0097 |
| PCM | -.00938 | .00496 | .083 | -.0202 | .0014 |
| PCM | PSONM | -.00122 | .00496 | .810 | -.0120 | .0096 |
| PSOM | -.01116* | .00496 | .044 | -.0220 | -.0003 |
| PCNM | .00938 | .00496 | .083 | -.0014 | .0202 |
| *. The mean difference is significant at the 0.05 level. | | | | | | | |


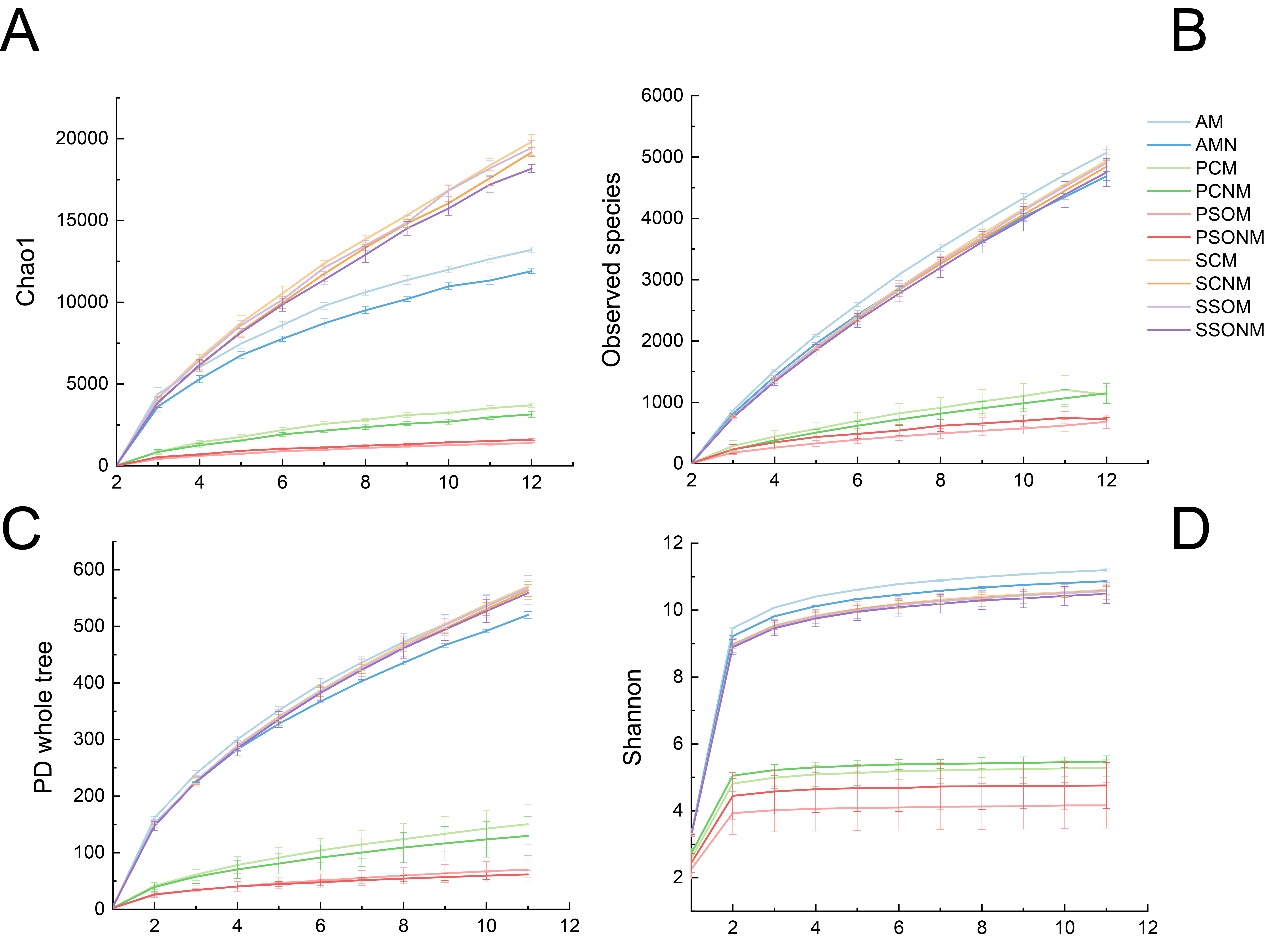


**Figure S2.** Chao1, Observed species, PD whole tree and Shannon analysis of Alpha diversity. “M” represents chamber 1 samples (with extra outdoor microbes) and “NM” represents chamber 2 samples (without extra microbes). AM, PCM, PSOM, SCM and SSOM represent air, phyllosphere and soil of *Allium schoenoprasum* and *Sonchus oleraceus* samples, respectively in chamber 1 (with external airborne microbes). ANM, PCNM, PSONM, SCNM and SSONM represent the air, phyllosphere and soil of *A. schoenoprasum* and *S. oleraceus* samples, respectively in chamber 2 (without external airborne microbes).


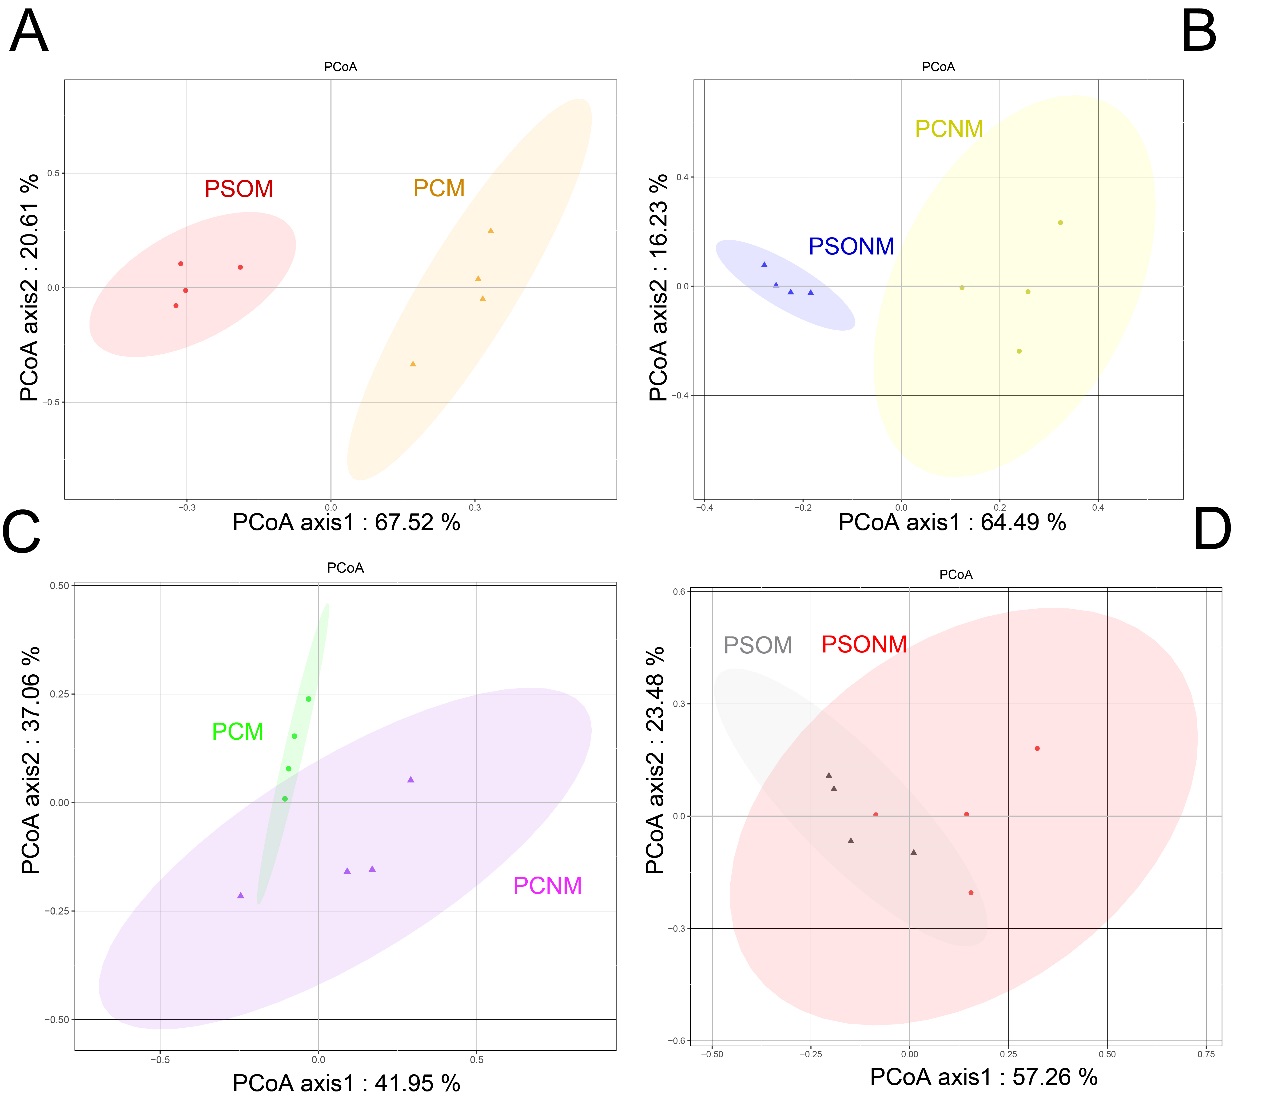


**Figure S3.** Principal Coordinate Analysis (PCoA) based on Bray-Curtis distances of bacterial OTU. (A) PCoA between *Allium schoenoprasum* and *Sonchus oleraceus* samples in chamber 1 (P < 0.05, PERMANOVA). PCM and PSOM represent *A. schoenoprasum* and *S. oleraceus* samples in chamber 1 (with extra air microbes), respectively. (B) PCoA between *A. schoenoprasum* and *S. oleraceus* samples in chamber 2 (P < 0.05, PERMANOVA). The PCNM and PSONM represent *A. schoenoprasum* and *S. oleraceus* samples in chamber 2 (without extra air microbes), respectively. (C) and (D) PCoA of *A. schoenoprasum* (P < 0.05, PERMANOVA)and *S. oleraceus* (P > 0.05, PERMANOVA)in chamber 1 and 2.
